# Supplementary material for: Changes in duodenal tissue-associated microbiota following hookworm infection and consecutive gluten challenges in humans with coeliac disease
Source: PubMed Central journal article supplement (PMC5101533; doi:10.1038/srep36797), 2016-11-09

**Changes in duodenal tissue-associated microbiota following hookworm infection  
and consecutive gluten challenges in humans with coeliac disease**

---

**Paul Giacomini<sup>1</sup>, Martha Zakrzewski<sup>2</sup>, Timothy Jenkins<sup>3</sup>, Xiaopei Su<sup>3</sup>, Rafid Al-Hallaf<sup>1</sup>, John Croese<sup>4</sup>, Stefan de Vries<sup>3</sup>, Andrew Grant<sup>3</sup>, Makedonka Mitreva<sup>5,6</sup>, Alex Loukas<sup>1\*</sup>, Lutz Krause<sup>7\*</sup>, Cinzia Cantacessi<sup>1,3\*</sup>**

**Supplementary Table S1** | Trial subject identification (ID) numbers or control subject (C) numbers displaying age, sex, baseline clinical diagnosis (T0 Marsh Score). Corresponding subjects IDs as indicated by Zaiss *et al.*<sup>20</sup> are also indicated where applicable.

| Subject | Age | Sex | Marsh score | Subject ID according to Zaiss <i>et al.</i> <sup>20</sup> |
|---------|-----|-----|-------------|-----------------------------------------------------------|
| ID1     | 44  | F   | M0          | Pt2                                                       |
| ID2     | 40  | F   | M0          | Pt3                                                       |
| ID3     | 48  | F   | M0          | Pt4                                                       |
| ID6     | 40  | M   | M0          | Pt8                                                       |
| ID7     | 64  | M   | M0          | Pt1                                                       |
| ID10    | 52  | M   | M2          | Pt7                                                       |
| C1      | 57  | F   | M3b         | n/a                                                       |
| C2      | 22  | M   | M3a         | n/a                                                       |
| C3      | 48  | F   | M3a         | n/a                                                       |
| C4      | 52  | F   | M3b         | n/a                                                       |
| C5      | 51  | M   | M3a         | n/a                                                       |
| C6      | 75  | M   | M3b         | n/a                                                       |

**Supplementary Table S2** | Differentially abundant OTUs in the mucosally-associated microbiota of Trial subjects over the course of the study.

| OTU                            | p-value | Adjusted p-value | FDR   |
|--------------------------------|---------|------------------|-------|
| Unassigned (kingdom)           | 0.0016  | 0.08             | 0.046 |
| <i>Ralstonia</i> (genus)       | 0.0025  | 0.12             | 0.046 |
| Chitinophagaceae (family)      | 0.0034  | 0.16             | 0.046 |
| Chitinophagaceae (family)      | 0.041   | 0.19             | 0.046 |
| Unassigned (kingdom)           | 0.0063  | 0.29             | 0.046 |
| Unassigned (kingdom)           | 0.0066  | 0.3              | 0.046 |
| <i>Phyllobacterium</i> (genus) | 0.007   | 0.31             | 0.046 |
| Unassigned (kingdom)           | 0.0074  | 0.32             | 0.046 |
| Chitinophagaceae (family)      | 0.0092  | 0.39             | 0.05  |
| Rhizobiales (order)            | 0.011   | 0.45             | 0.05  |
| Rhizobiales (order)            | 0.011   | 0.45             | 0.05  |
| Rhizobiales (order)            | 0.012   | 0.47             | 0.05  |

**Supplementary Figure S1 |** Microbial composition of duodenal biopsy samples, at the phylum (a) and genus (b) level, from Trial subjects (ID\*) prior to and following hookworm infection (T0), as well as following administration of escalating doses of gluten (10-50 mg/day – T24; 350 mg/day – T36) as predicted in the analysis of the V1-V3 16S rRNA gene. Bubble sizes reveal the relative abundance (%) of phylotypes (based on 97% sequence identity) in each sample. The composition of the microbial communities detected in duodenal biopsy samples from Control subjects with active coeliac disease (C\*) is also shown. OTUs listed were present in at least one sample at a relative abundance of  $\geq 7\%$ .

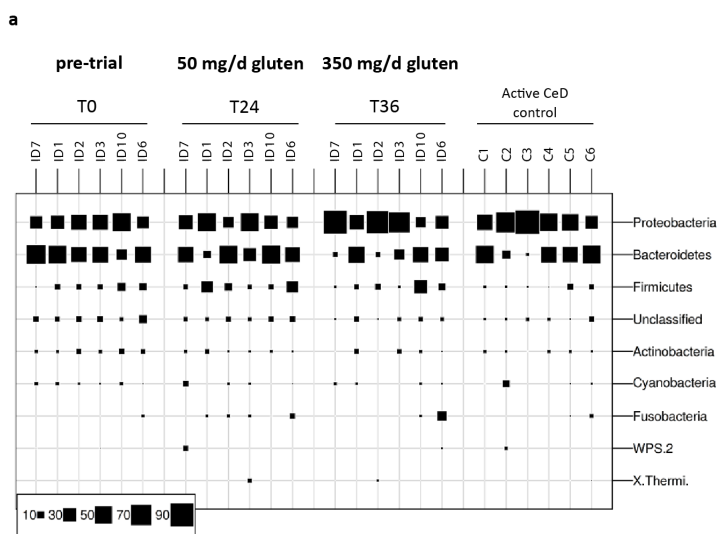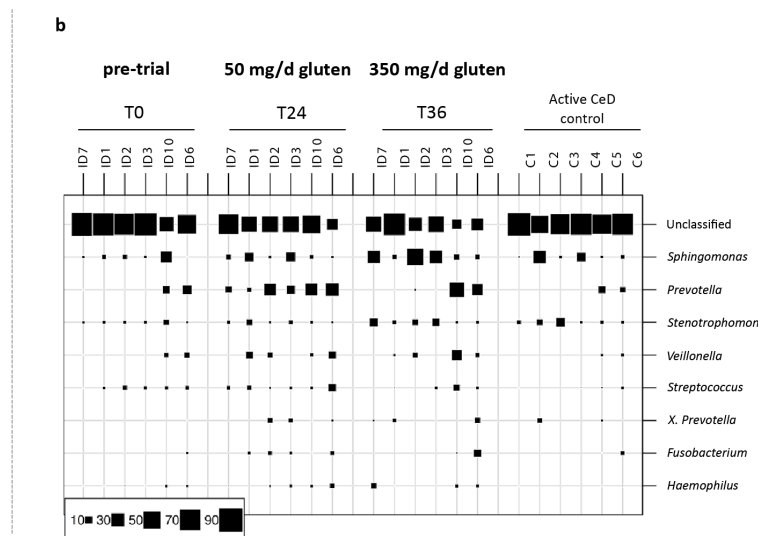

Supplement: srep36797-s2.pdf [file srep36797-s2.pdf]
